# Supplementary material for: An adaptable soft-mold embossing process for fabricating optically-accessible, microfeature-based culture systems and application toward liver stage antimalarial compound testing
Source: Royal Society of Chemistry journal article supplement (doi:10.1039/c9lc00921c), 2020-01-01
Supplement: c9lc00921c2.xlsx [file c9lc00921c2.xlsx]

## Sheet: Sheet1
	Table S2 Replication Table. A summary of the exerimental questions addressed in corresponding figures, technical and independent replication of the experiment, the primary human hepatocytes used for each replicate, and which dataset is displayed in the corresponding figure
	Experiment	Figure	Data Type	Result	Technical Replication (wells)	Biological Replication (independent culture or independent experiments)	Hepatocytes Lot, Company	Representative Data Displayed
	Proof of concept, PDMS CPMW, PHH long term culture	Fig. 1B	Qualitative	Phase image of PHHs after 3 weeks of culture	>4	4	HHM 11003, Yecuris	Yes
							NON, BioIVT
							NON, BioIVT
							NON, BioIVT
	Proof of concept, PDMS CPMW, PHH long term culture	Fig. 1C	Quantitative	Albumin production by PHH during 3 weeks of culture	4	3	HHM 11003, Yecuris	Yes
							NON, BioIVT
							NON, BioIVT
	Proof of concept, PDMS CPMW, PHH metabolism	Fig. 1D	Quantitative	CYP3A4 induction assay	4	2	HHM 11003, Yecuris	Yes
							NON, BioIVT
	Proof of concept, PDMS CPMW, PHH polarity and functional staining	Fig. 1E	Qualitative	Polarity marker localization by IFA, bile formation	>4	3	HHM 11003, Yecuris
							NON, BioIVT
							NLX, BioIVT	Yes
	Proof of concept, PDMS CPMW, PHH infection with P. vivax	Fig. 1F	Qualitative	Immunostaining of LS Parasites	>4	2	NON, BioIVT	Yes
							NLX, BioIVT	Yes
	Design optimation screen 1: Test of various CPMW diameters (100, 125, 150, 200 µm) for superior support of albumin production over long term culture	Fig.S1A,B	Qualitative	Live/Dead staining of PHH after long term culture	1 per condition	2	NON, BioIVT
							NLX, BioIVT	Yes
		Fig. S1C	Quantitative	Albumin production by PHH during 3 weeks of culture	1 per condition	2	NON, BioIVT	Yes
							NLX, BioIVT	Yes
	PS μHEP fabrication	Fig. 2	Qualitative	Fabrication of 48-well and 384-well μHEP devices	n/a	>200	n/a	Yes
	Design optimation screen 2: PS-CPMW μHEP collagen coating and surface treatment, long term PHH culture	Fig. S2A	Qualitative	Phase and Live/Dead imaging of PHH in treated versus untreatd devices after long term culture	>4	2	NON, BioIVT	Yes
							NLX, BioIVT	Yes
		Fig. S2B	Quantitative	Cell number and albumin production from PHH cultured on various surface treatments and collagen coatings	4 per condition	3	NON, BioIVT
					1 per condition		NON, BioIVT	Yes
					1 per condition		NLX, BioIVT	Yes
	PS μHEP fabrication	Fig. S3	Qualitative	Fabrication of multiple microfeature geometries	8 wells / 48-well μHEP slide	>100	n/a	Yes
	Design optimation screen 3: PS- μHEP geometry and surface treatment, long term PHH culture and LS Parasite infection	Fig. S4A	Qualitative	Phase images of PHH in geometries after 1 and 2 weeks	8 per condition	>3	PDC, BioIVT	Yes
							NON, BioIVT
							NLX, BioIVT
		Fig. S4B	Quantitative	Albumin production by PHH during 3 weeks of culture	1 per condition	1 (repeated for active-treated 3x3 in Fig. S6C below)	NLX, BioIVT	Yes
	High resolution imaging of LS parasites in PS μHEP	Fig. 3A	Qualitative	Imaging with 100x objective	>4	>4	NLX, BioIVT	Yes
	Automated imaging of LS parsites in PS μHEP	Fig. 3B	Qualitative	Imaging with a 10x objective, whole well paneling	>4	>4	NLX, BioIVT	Yes
	High content imaging and quantification of PHH nuclei in PS μHEP	Fig. 3C	Quantitative	Imaging with a 20x objective, quantification of nuclei, 384well plate	>4	1	PDC, BioIVT	Yes
	Design optimation screen 4: Screening geometries and treatments for ideal LS Parasite culture conditions	Fig. 4A	Quantitative	Imaging with a 10x objective, whole well paneling, quantification of LS parasites	1 per condition	2	NLX, BioIVT
					4		NLX, BioIVT	Yes
	Correlation of attachement area to infection rate	Fig. S5	Quantitative	Imaging and quantificaiton of LS Parasite infection rate of active treated geometries	4	2	NLX, BioIVT	Yes
		Fig. S6A,B			3		NLX, BioIVT	Yes
	Characterization of PHH phenotypes in PS 3x3 μHEP culture	Fig. S6C,D	Quantitative	Albumin production and CYP3A4 induction by PHH during 3 weeks of culture	4	1 (repeat for albumin production in Fig. S4B above	NLX, BioIVT	Yes
	Characterization of LS Parasite populations in PS 3x3 μHEP	Fig. 4B	Quantitative	High content analysis for LS Parasite growth area at day 6 and day 9 post infection	>4	3	NLX, BioIVT	Yes
	Demonstration of long term P. vivax infection in PHH, persistence of hypnozoites, and delayed schizont formation	Fig. 4C	Qualitative	High content analysis for LS Parasite growth area at day 5, 8, 12, 14 and 30 post infection	48 per timepoint	3	NLX, BioIVT
							NLX, BioIVT
							PDC, BioIVT	Yes
	Prophylactic and Radical Cure antimalarial assays in PS μHEP	Fig. 4D, Fig.S7	Quantitative	High content analysis for LS Parasite growth after Prophylactic and Radical Cure treatment	1 well per concentration per drug. 12 DMSO control wells	3	NON, BioIVT
							NLX, BioIVT
							NLX, BioIVT	Yes
	RNAseq of PHH gene expression in different culture systems	Fig. 5	Quantitative	RNAseq, various culture systems	5 device timepoints, 2 384-well and 2 large culture area plates	1	PDC, BioIVT	Yes
